# Supplementary material
Source: Springer Nature journal article supplement (https://www.springermedizin.de/resource/supplementary/12936_2009_1089_MOESM6_ESM.pdf/9550014)

**A****Karimui**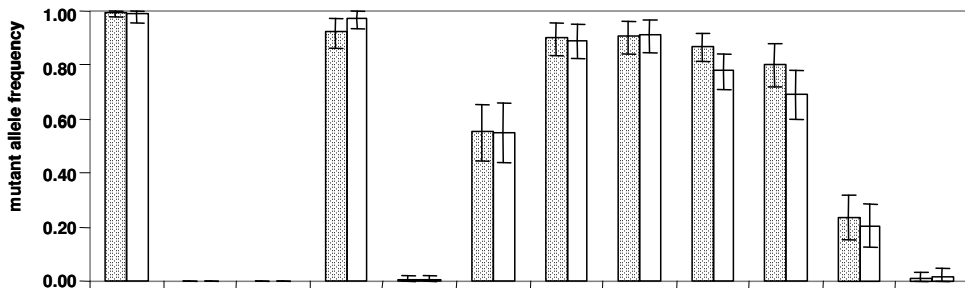**B****South Wosera**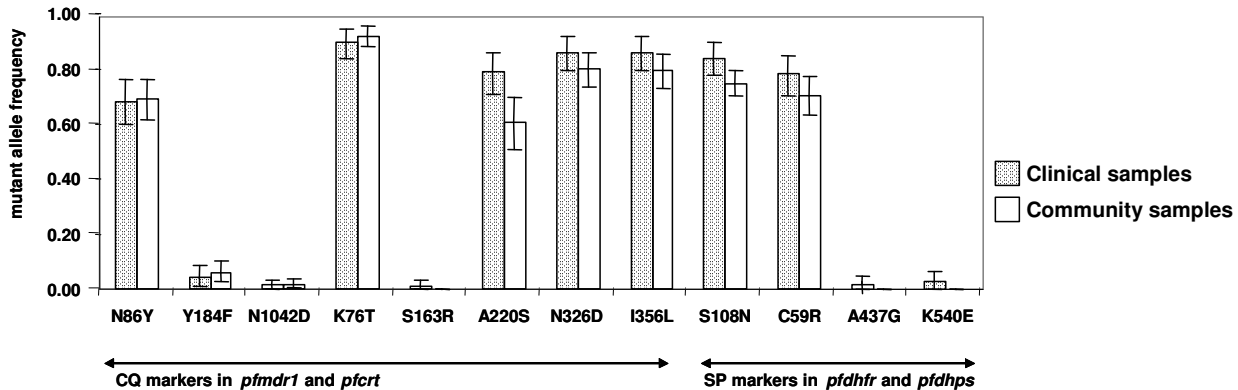

Supplement: MOESM6 [file 9550014]
